# Supplementary material for: Smoking and Long-Term Risk of Type 2 Diabetes: The EPIC-InterAct Study in European Populations
Source: Oxford University Press journal article supplement (doi:10.2337/dc14-1020), 2014-10-22
Supplement: dc141020supplementarydata.pdf [file dc141020supplementarydata.pdf]

## SUPPLEMENTARY DATA

### **Supplementary Figure 1 and 2.**

Association of smoking status and risk of type 2 diabetes for men with never smokers as the reference group.

Country-specific Hazard Ratios (HRs) (95% confidence intervals) were derived from modified Cox proportional hazard regression and were pooled using a random effects meta-analysis.

eFigure 1: Model 2: HRs adjusted for age, educational level, centre, physical activity, consumption of alcohol, coffee and meat.

Heterogeneity former smokers,  $I^2 = 0.0\%$   
Heterogeneity current smokers,  $I^2 = 0.0\%$

eFigure 2: Model 4: HRs adjusted for age, educational level, centre, physical activity, consumption of alcohol, coffee and meat and BMI.

Heterogeneity former smokers,  $I^2 = 0.0\%$   
Heterogeneity current smokers,  $I^2 = 7.1\%$

# SUPPLEMENTARY DATA

**eFigure 1 Men**

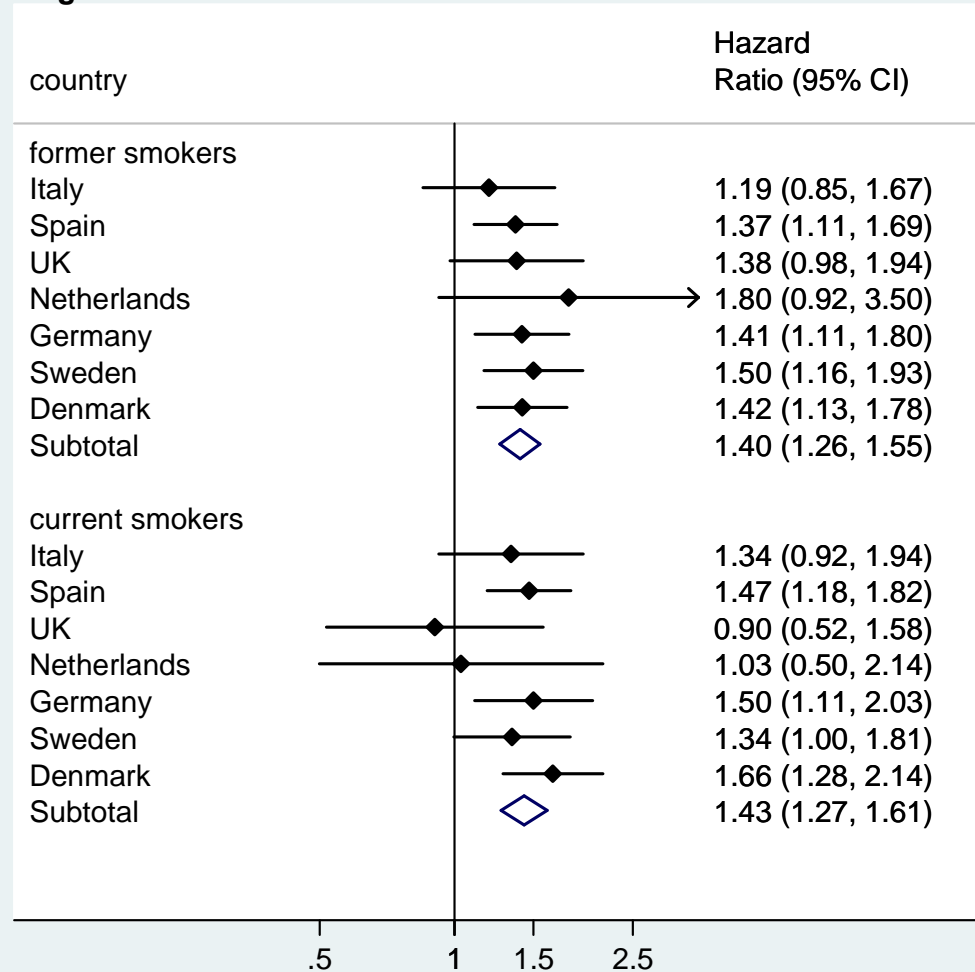

# SUPPLEMENTARY DATA

**eFigure 2 Men**

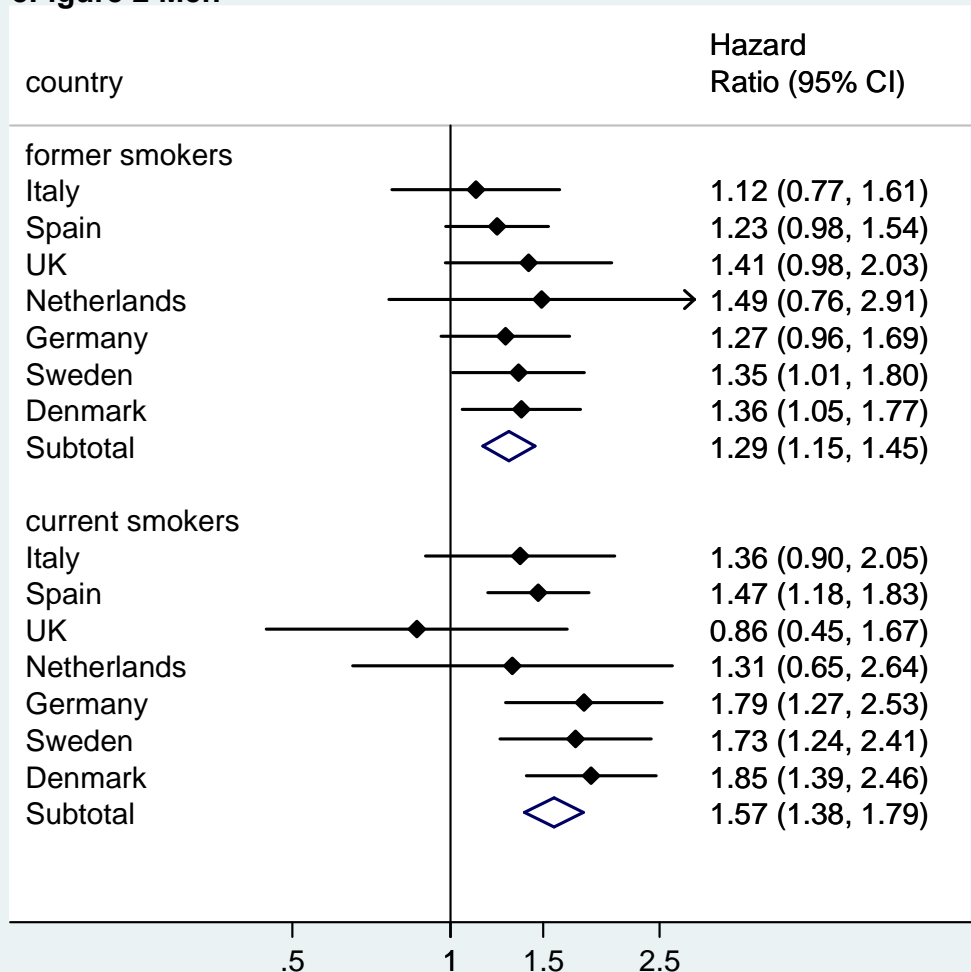

## SUPPLEMENTARY DATA

### **Supplementary Figure 3 and 4.**

Association of smoking status and risk of type 2 diabetes for women with never smokers as the reference group.

Country-specific Hazard Ratios (HRs) (95% confidence intervals) were derived from modified Cox proportional hazard regression and were pooled using a random effects meta-analysis.

eFigure 3: Model 2: HRs adjusted for age, educational level, centre, physical activity, consumption of alcohol, coffee and meat.

Heterogeneity former smokers,  $I^2=60.1\%$

Heterogeneity current smokers,  $I^2=0.0\%$

eFigure 4: Model 4: HRs adjusted for age, educational level, centre, physical activity, consumption of alcohol, coffee and meat and BMI.

Heterogeneity former smokers,  $I^2=29.9\%$

Heterogeneity current smokers,  $I^2=0.0\%$

# SUPPLEMENTARY DATA

**eFigure 3 Women**

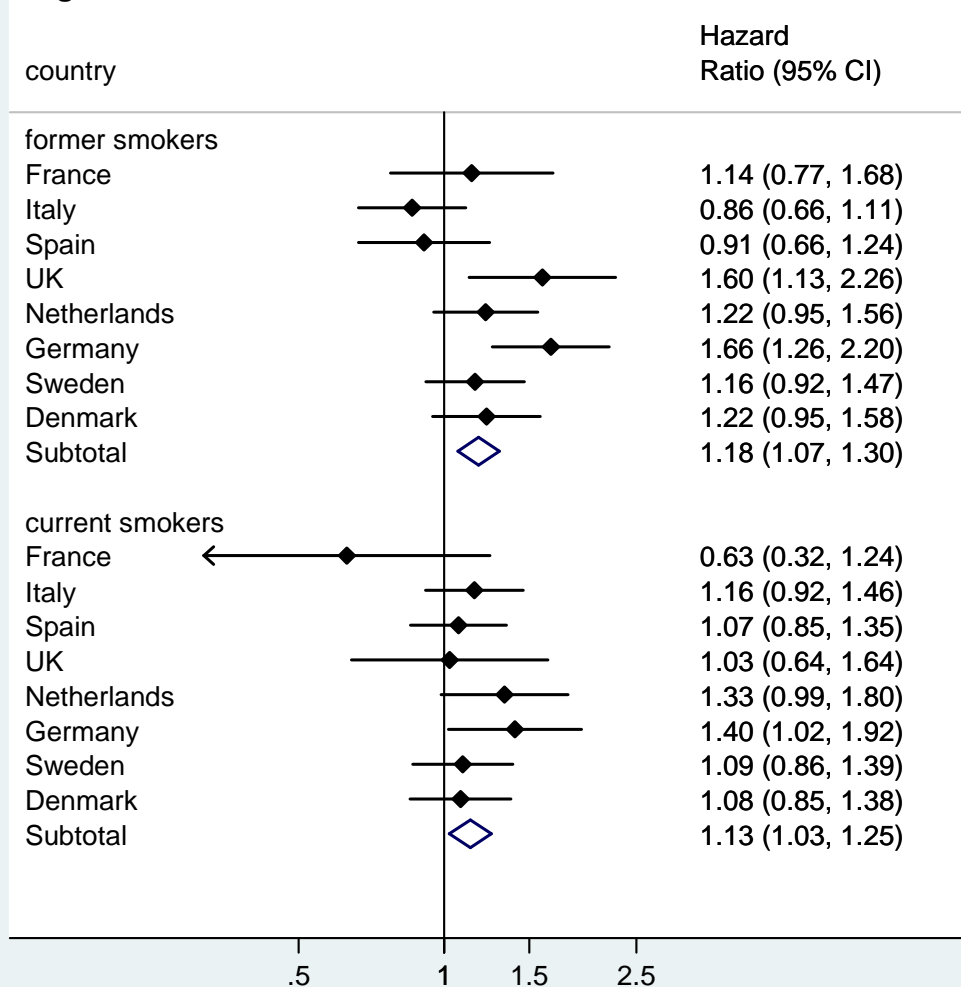

# SUPPLEMENTARY DATA

**eFigure 4 Women**

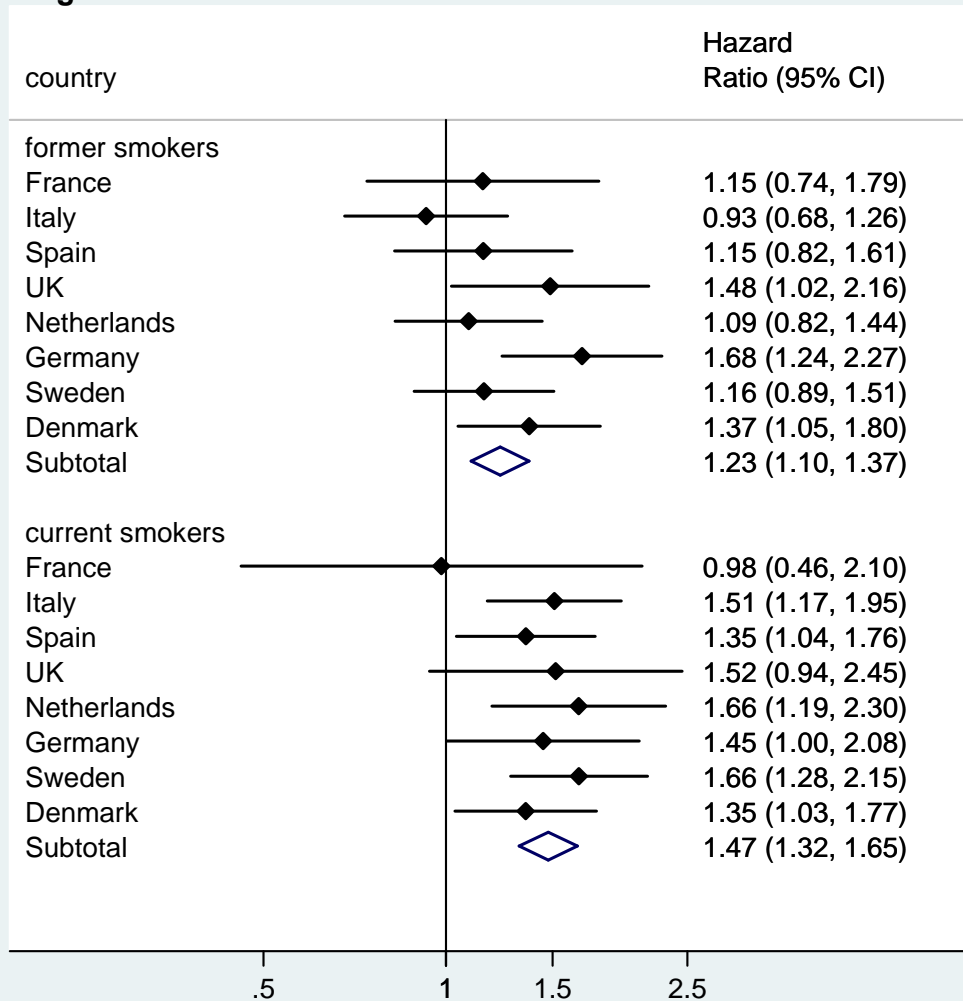

# SUPPLEMENTARY DATA

**Supplementary Table 1.** Distribution of Smoking Status, Age, Time Since Quitting, Pack Years and Number of Daily Cigarettes per Country in the EPIC-Interact Subcohort

| <b>MEN</b>     | <b>Never</b> | <b>Age</b>  | <b>Former</b> | <b>Age</b>  | <b>Time since quitting</b> | <b>Packyears</b> | <b>Current</b> | <b>Age</b>  | <b>Cigs/day</b> | <b>Packyears</b> |
|----------------|--------------|-------------|---------------|-------------|----------------------------|------------------|----------------|-------------|-----------------|------------------|
| Italy          | 26.8         | 49.5 (7.9)  | 43.6          | 50.5 (7.3)  | 13.3 (8-18.5)              | 12.2 (6.3-19.6)  | 29.6           | 48.4 (7.4)  | 16 (6-21)       | 21.7 (14.4-28.9) |
| Spain          | 31.3         | 50.9 (6.9)  | 34.6          | 50.7 (7.1)  | 9.3 (3.5-15.5)             | 20.0 (11.6-31.0) | 34.1           | 49.5 (7.0)  | 18 (8-20)       | 25.1 (15.3-35.2) |
| United Kingdom | 38.2         | 55.9 (10.3) | 51.1          | 61.1 (9.3)  | 19.0 (10.5-27.5)           | 15.0 (8.25-26.0) | 10.6           | 56.6 (8.6)  | 20 (10-20)      | 33.7 (23.2-41.3) |
| Netherlands    | 31.8         | 40.4 (11.7) | 29.6          | 47.8 (11.3) | 12.5 (5.0-20.5)            | 12.3 (5.0-26.5)  | 38.6           | 41.8 (11.3) | 15 (10-20)      | 15.4 (6.4-35.4)  |
| Germany        | 32.5         | 52.4 (7.6)  | 45.6          | 52.8 (7.4)  | 16.5 (8.5-24.0)            | 11.7 (6.0-18.8)  | 21.9           | 51.1 (8.0)  | 20 (10-25)      | 23.0 (17.3-31.3) |
| Sweden         | 41.4         | 50.7 (11.9) | 36.4          | 57.2 (9.0)  | 16.0 (8.0-25.5)            | --               | 22.2           | 54.3 (8.5)  | 15 (10-20)      | --               |
| Denmark        | 28.1         | 56.2 (4.2)  | 41.0          | 57.1 (4.5)  | 17.0 (8.0-24.5)            | 14.2 (6.3-24.0)  | 30.9           | 56.3 (4.4)  | 16 (10-20)      | 30.3 (18.5-38.7) |
| <b>WOMEN</b>   |              |             |               |             |                            |                  |                |             |                 |                  |
| France         | 69.0         | 56.7 (6.5)  | 22.6          | 54.8 (6.2)  | 15.0 (7.5-20.0)            | --               | 8.4            | 57.0 (7.1)  | 10 (10-30)      | --               |
| Italy          | 54.0         | 51.7 (8.0)  | 20.7          | 49.4 (7.7)  | 10.5 (5.5-16.0)            | 6.1 (2.7-12.4)   | 25.3           | 48.4 (7.8)  | 11 (6-16)       | 12.1 (7.4-17.7)  |
| Spain          | 70.8         | 50.3 (8.0)  | 10.3          | 43.1 (6.0)  | 6.5 (2.5-13.5)             | 5.8 (2.7-12.5)   | 19.0           | 43.1 (6.2)  | 12 (6-20)       | 10.1 (6.0-16.4)  |
| United Kingdom | 59.9         | 55.4 (11.5) | 28.1          | 57.0 (11.0) | 16.3 (8.0-25.3)            | 9.4 (3.0-16.4)   | 12.0           | 54.4 (9.4)  | 12 (5-20)       | 21.4 (12.6-29.5) |
| Netherlands    | 42.0         | 54.9 (10.3) | 33.7          | 54.8 (8.7)  | 16.5 (7.5-23.5)            | 8.1 (3.0-18.0)   | 24.3           | 51.7 (10.5) | 15 (8-20)       | 19.2 (11.6-27.2) |
| Germany        | 57.7         | 50.4 (9.1)  | 24.5          | 47.3 (8.4)  | 14.5 (7.0-21.5)            | 5.0 (2.6-11.3)   | 17.8           | 46.2 (7.8)  | 10 (6-15)       | 12.3 (7.0-20.5)  |
| Sweden         | 49.8         | 54.0 (11.3) | 22.2          | 54.4 (9.0)  | 14.5 (6.0-22.5)            | --               | 28.0           | 52.6 (9.6)  | 10 (8-16)       | --               |
| Denmark        | 42.6         | 56.5 (4.1)  | 22.0          | 56.6 (4.5)  | 18 (10.0-26.5)             | 8.2 (3.0-15.0)   | 35.5           | 53.6 (4.5)  | 15 (10-20)      | 23.5 (14.9-29.7) |

Data are %, means (standard deviation) or median (interquartile range).

# SUPPLEMENTARY DATA

**Supplementary Table 2.** Hazard Ratios of 2 Categories of Former Smokers, and 2 Categories of Current Smokers for Diabetes Incidence, for Men and Women Separately in the EPIC-Interact Study

| <b>MEN</b>                 | <b>Never smokers</b> | <b>Former, &lt;10 yrs</b> |               | <b>Former, ≥ 10 yrs</b> |               | <b>Current, &lt;20 cigs/day</b> |               | <b>Current, ≥ 20 cigs/day</b> |               |
|----------------------------|----------------------|---------------------------|---------------|-------------------------|---------------|---------------------------------|---------------|-------------------------------|---------------|
| <b>Cases/ participants</b> | <b>1201/2708</b>     | <b>HR 830/1435</b>        | <b>95% CI</b> | <b>HR 1396/2623</b>     | <b>95% CI</b> | <b>HR 718/1424</b>              | <b>95% CI</b> | <b>HR 798/1394</b>            | <b>95% CI</b> |
| Model 1                    | 1                    | 1.75                      | (1.54, 1.99)  | 1.31                    | (1.17, 1.46)  | 1.34                            | (1.18, 1.53)  | 1.90                          | (1.66, 2.17)  |
| Model 2                    | 1                    | 1.69                      | (1.48, 1.93)  | 1.29                    | (1.16, 1.45)  | 1.27                            | (1.11, 1.46)  | 1.79                          | (1.55, 2.07)  |
| Model 3                    | 1                    | 1.48                      | (1.28, 1.72)  | 1.20                    | (1.06, 1.37)  | 1.43                            | (1.24, 1.66)  | 1.89                          | (1.62, 2.21)  |
| <b>WOMEN</b>               | <b>Never smokers</b> | <b>Former, &lt;10 yrs</b> |               | <b>Former, ≥ 10 yrs</b> |               | <b>Current, &lt;20 cigs/day</b> |               | <b>Current, ≥ 20 cigs/day</b> |               |
| <b>Cases/ participants</b> | <b>3137/7960</b>     | <b>HR 424/1068</b>        | <b>95% CI</b> | <b>HR 685/1864</b>      | <b>95% CI</b> | <b>HR 729/2097</b>              | <b>95% CI</b> | <b>HR 409/928</b>             | <b>95% CI</b> |
| Model 1                    | 1                    | 1.29                      | (1.12, 1.48)  | 0.95                    | (0.85, 1.06)  | 0.93                            | (0.83, 1.03)  | 1.45                          | (1.26, 1.68)  |
| Model 2                    | 1                    | 1.42                      | (1.23, 1.63)  | 1.08                    | (0.96, 1.20)  | 0.97                            | (0.87, 1.09)  | 1.61                          | (1.39, 1.88)  |
| Model 3                    | 1                    | 1.43                      | (1.21, 1.68)  | 1.13                    | (1.00, 1.28)  | 1.27                            | (1.12, 1.44)  | 1.84                          | (1.54, 2.20)  |

Presented data are Hazard Ratios (95% confidence intervals) from modified Cox proportional hazard regression models.

Never smokers as the reference group. Total cases/participants: 10,327/23,514.

Model 1: age adjusted; Model 2: 1 + educational level, physical activity, intake of alcohol, coffee and meat; Model 3: 1 + educational level, physical activity, intake of alcohol, coffee and meat and BMI.



# SUPPLEMENTARY DATA

**Supplementary Table 3.** Hazard Ratios of 2 Categories of Former Smokers, and 2 Categories of Current Smokers for Diabetes Incidence, for Men and Women in Strata of BMI in the EPIC-Interact Study

| <b>MEN</b>         | <b>Never smokers</b> | <b>Former, &lt;10 yrs HR</b> | <b>95%CI</b> | <b>Former, ≥ 10 yrs HR</b> | <b>95%CI</b> | <b>Current, &lt;20 cigs/day HR</b> | <b>95%CI</b> | <b>Current, ≥ 20 cigs/day HR</b> | <b>95%CI</b> |
|--------------------|----------------------|------------------------------|--------------|----------------------------|--------------|------------------------------------|--------------|----------------------------------|--------------|
| <b>BMI &lt; 25</b> | 1                    | 1.56                         | (1.04, 2.34) | 1.61                       | (1.21, 2.14) | 1.52                               | (1.10, 2.11) | 2.07                             | (1.46, 2.95) |
| <b>BMI ≥ 25</b>    | 1                    | 1.40                         | (1.19, 1.64) | 1.15                       | (1.00, 1.31) | 1.33                               | (1.13, 1.58) | 1.67                             | (1.41, 1.98) |
| <b>WOMEN</b>       | <b>Never smokers</b> | <b>Former, &lt;10 yrs HR</b> | <b>95%CI</b> | <b>Former, ≥ 10 yrs HR</b> | <b>95%CI</b> | <b>Current, &lt;20 cigs/day HR</b> | <b>95%CI</b> | <b>Current, ≥ 20 cigs/day HR</b> | <b>95%CI</b> |
| <b>BMI &lt; 25</b> | 1                    | 1.18                         | (0.84, 1.64) | 1.03                       | (0.81, 1.31) | 1.37                               | (1.10, 1.71) | 1.61                             | (1.18, 2.19) |
| <b>BMI ≥ 25</b>    | 1                    | 1.34                         | (1.11, 1.62) | 1.13                       | (0.97, 1.30) | 1.23                               | (1.06, 1.44) | 1.68                             | (1.37, 2.06) |

Presented data are Hazard Ratios (95% confidence intervals) from modified Cox proportional hazard regression models. Never smokers as the reference group. HRs for smoking status adjusted for age, educational level, physical activity, intake of alcohol, coffee and meat and waist.
